# Supplementary material
Source: HighWire-hosted journal article supplement (https://jnm.snmjournals.org/highwire/filestream/95321/field_highwire_adjunct_files/0/206672_Supplemental_Data.pdf)
Supplement: 206672_Supplemental_Data.pdf [file 206672_Supplemental_Data.pdf]

**Supplemental Table 1.** [<sup>195m</sup>Pt][Lx(H<sub>2</sub>O)<sub>2</sub>](NO<sub>3</sub>)<sub>2</sub> batch characteristics

---

|                                                        |                                                                                                                                                                                                                                                                                                                                                                  |
|--------------------------------------------------------|------------------------------------------------------------------------------------------------------------------------------------------------------------------------------------------------------------------------------------------------------------------------------------------------------------------------------------------------------------------|
| <b>volume</b>                                          | 394 μL                                                                                                                                                                                                                                                                                                                                                           |
| <b>Pt quantity</b>                                     | 31.6 μmol                                                                                                                                                                                                                                                                                                                                                        |
| <b>Pt concentration</b>                                | 77 mM                                                                                                                                                                                                                                                                                                                                                            |
| <b>pH</b>                                              | 2.5                                                                                                                                                                                                                                                                                                                                                              |
| <b>activity concentration on ART</b>                   | 857 MBq/mL <sup>195m</sup> Pt                                                                                                                                                                                                                                                                                                                                    |
| <b>specific activity on EOI</b>                        | 86 MBq/mg Pt                                                                                                                                                                                                                                                                                                                                                     |
| <b>radiochemical purity on ART</b>                     | 94.758%                                                                                                                                                                                                                                                                                                                                                          |
| <b>radiochemical impurities on ART (% , half-life)</b> | <sup>197</sup> Pt (3.366%, 19.9 h)<br><sup>191</sup> Pt (0.016%, 2.86 days)<br><sup>198</sup> Au (0.472%, 2.70 days)<br><sup>199</sup> Au (0.795%, 3.14 days)<br><sup>192</sup> Ir (0.029%, 73.83 days)<br><sup>194</sup> Ir (0.066%, 19.3 h)<br><sup>115</sup> Cd (0.014%, 2.23 days)<br><sup>187</sup> W (0.006%, 23.7 h)<br><sup>64</sup> Cu (0.026%, 12.7 h) |

---

ART: 62 h after EOI

**Supplemental Table 2.** Uptake values corresponding to Figure 2A

| trastuzumab-[ <sup>195m</sup> Pt]Lx-DFO- <sup>89</sup> Zr (1) |                                            |   |      |                                              |   |      |
|---------------------------------------------------------------|--------------------------------------------|---|------|----------------------------------------------|---|------|
|                                                               | <i>(based on <sup>89</sup>Zr counting)</i> |   |      | <i>(based on <sup>195m</sup>Pt counting)</i> |   |      |
| <b>blood</b>                                                  | 7.41                                       | ± | 2.69 | 6.77                                         | ± | 2.88 |
| <b>tumor</b>                                                  | 29.26                                      | ± | 8.77 | 35.54                                        | ± | 9.37 |
| <b>skin</b>                                                   | 5.63                                       | ± | 1.64 | 4.04                                         | ± | 1.23 |
| <b>tongue</b>                                                 | 2.77                                       | ± | 0.66 | 3.12                                         | ± | 1.85 |
| <b>sternum</b>                                                | 2.69                                       | ± | 0.34 | 1.97                                         | ± | 0.62 |
| <b>heart</b>                                                  | 2.47                                       | ± | 0.61 | 2.20                                         | ± | 0.98 |
| <b>lung</b>                                                   | 3.59                                       | ± | 0.87 | 3.55                                         | ± | 1.38 |
| <b>liver</b>                                                  | 9.24                                       | ± | 4.37 | 7.77                                         | ± | 3.75 |
| <b>spleen</b>                                                 | 3.85                                       | ± | 0.83 | 3.42                                         | ± | 0.79 |
| <b>kidney</b>                                                 | 5.10                                       | ± | 1.01 | 5.68                                         | ± | 0.90 |
| <b>muscle</b>                                                 | 1.22                                       | ± | 0.27 | 1.39                                         | ± | 0.35 |
| <b>femur</b>                                                  | 3.02                                       | ± | 0.55 | 1.08                                         | ± | 0.61 |
| <b>colon</b>                                                  | 1.27                                       | ± | 0.28 | 1.44                                         | ± | 0.33 |
| <b>ileum</b>                                                  | 2.18                                       | ± | 0.32 | 1.76                                         | ± | 0.33 |
| <b>stomach</b>                                                | 1.49                                       | ± | 0.31 | 1.37                                         | ± | 0.36 |

Mean (%ID/g) ± SD (n = seven animals per conjugate)

**Supplemental Table 3.** Values corresponding to Figure 2B

| time (h)  | trastuzumab- <sup>195m</sup> Pt]Lx-DFO- <sup>89</sup> Zr (1) |   |      |                                              |   |      |
|-----------|--------------------------------------------------------------|---|------|----------------------------------------------|---|------|
|           | <i>(based on <sup>89</sup>Zr counting)</i>                   |   |      | <i>(based on <sup>195m</sup>Pt counting)</i> |   |      |
| <b>2</b>  | 24.38                                                        | ± | 7.92 | 25.17                                        | ± | 7.67 |
| <b>24</b> | 12.87                                                        | ± | 3.00 | 11.92                                        | ± | 2.08 |
| <b>48</b> | 9.74                                                         | ± | 2.66 | 9.81                                         | ± | 3.02 |
| <b>72</b> | 7.41                                                         | ± | 2.69 | 6.83                                         | ± | 2.63 |

Mean (%ID/g) ± SD (n = seven animals per conjugate)

**Supplemental Table 4.** Uptake values corresponding to Figure 3A

|                | trastuzumab- <sup>[195mPt]</sup> Lx-DFO- <sup>89</sup> Zr (1) |   |      | <sup>89</sup> Zr-DFO-(Lys)trastuzumab (2)  |   |      |
|----------------|---------------------------------------------------------------|---|------|--------------------------------------------|---|------|
|                | <i>(based on <sup>89</sup>Zr counting)</i>                    |   |      | <i>(based on <sup>89</sup>Zr counting)</i> |   |      |
| <b>blood</b>   | 7.41                                                          | ± | 2.69 | 10.48                                      | ± | 2.13 |
| <b>tumor</b>   | 29.26                                                         | ± | 8.77 | 31.62                                      | ± | 2.97 |
| <b>skin</b>    | 5.63                                                          | ± | 1.64 | 4.35                                       | ± | 0.15 |
| <b>tongue</b>  | 2.77                                                          | ± | 0.66 | 3.51                                       | ± | 0.54 |
| <b>sternum</b> | 2.69                                                          | ± | 0.34 | 2.61                                       | ± | 0.34 |
| <b>heart</b>   | 2.47                                                          | ± | 0.61 | 3.11                                       | ± | 0.79 |
| <b>lung</b>    | 3.59                                                          | ± | 0.87 | 4.44                                       | ± | 0.99 |
| <b>liver</b>   | 9.24                                                          | ± | 4.37 | 4.86                                       | ± | 0.51 |
| <b>spleen</b>  | 3.85                                                          | ± | 0.83 | 3.94                                       | ± | 0.67 |
| <b>kidney</b>  | 5.10                                                          | ± | 1.01 | 4.67                                       | ± | 0.50 |
| <b>muscle</b>  | 1.22                                                          | ± | 0.27 | 1.52                                       | ± | 0.36 |
| <b>femur</b>   | 3.02                                                          | ± | 0.55 | 2.54                                       | ± | 0.19 |
| <b>colon</b>   | 1.27                                                          | ± | 0.28 | 1.16                                       | ± | 0.31 |
| <b>ileum</b>   | 2.18                                                          | ± | 0.32 | 1.56                                       | ± | 0.25 |
| <b>stomach</b> | 1.49                                                          | ± | 0.31 | 1.42                                       | ± | 0.20 |

Mean (%ID/g) ± SD (n = seven animals per conjugate 1; n = six animals per conjugate 2)

**Supplemental Table 5.** Values corresponding to Figure 3B

| time<br>(h) | trastuzumab-[ <sup>195m</sup> Pt]Lx-DFO- <sup>89</sup> Zr ( <b>1</b> )<br><i>(based on <sup>89</sup>Zr counting)</i> |   |      | <sup>89</sup> Zr-DFO-(Lys)trastuzumab ( <b>2</b> )<br><i>(based on <sup>89</sup>Zr counting)</i> |   |      |
|-------------|----------------------------------------------------------------------------------------------------------------------|---|------|--------------------------------------------------------------------------------------------------|---|------|
| <b>2</b>    | 24.38                                                                                                                | ± | 7.92 | 23.44                                                                                            | ± | 8.50 |
| <b>24</b>   | 12.87                                                                                                                | ± | 3.00 | 14.63                                                                                            | ± | 2.15 |
| <b>48</b>   | 9.74                                                                                                                 | ± | 2.66 | 12.66                                                                                            | ± | 1.85 |
| <b>72</b>   | 7.41                                                                                                                 | ± | 2.69 | 10.48                                                                                            | ± | 2.13 |

Mean (%ID/g) ± SD (n = seven animals per conjugate **1**; n = six animals per conjugate **2**)

**Supplemental Table 6.** Uptake values corresponding to Figure 4A

|                | trastuzumab-[ <sup>195m</sup> Pt]Lx-DFO- <sup>89</sup> Zr ( <b>1</b> ) |   |      | trastuzumab-[ <sup>195m</sup> Pt]Lx-AF ( <b>3</b> ) |   |      |
|----------------|------------------------------------------------------------------------|---|------|-----------------------------------------------------|---|------|
|                | <i>(based on <sup>195m</sup>Pt counting)</i>                           |   |      | <i>(based on <sup>195m</sup>Pt counting)</i>        |   |      |
| <b>blood</b>   | 6.77                                                                   | ± | 2.88 | 8.03                                                | ± | 1.16 |
| <b>tumor</b>   | 35.54                                                                  | ± | 9.37 | 32.18                                               | ± | 7.64 |
| <b>skin</b>    | 4.04                                                                   | ± | 1.23 | 3.41                                                | ± | 0.59 |
| <b>tongue</b>  | 3.12                                                                   | ± | 1.85 | 1.94                                                | ± | 0.55 |
| <b>sternum</b> | 1.97                                                                   | ± | 0.62 | 1.68                                                | ± | 0.49 |
| <b>heart</b>   | 2.20                                                                   | ± | 0.98 | 2.36                                                | ± | 0.65 |
| <b>lung</b>    | 3.55                                                                   | ± | 1.38 | 3.56                                                | ± | 0.74 |
| <b>liver</b>   | 7.77                                                                   | ± | 3.75 | 17.02                                               | ± | 2.19 |
| <b>spleen</b>  | 3.42                                                                   | ± | 0.79 | 4.16                                                | ± | 0.46 |
| <b>kidney</b>  | 5.68                                                                   | ± | 0.90 | 6.83                                                | ± | 1.00 |
| <b>muscle</b>  | 1.39                                                                   | ± | 0.35 | 0.95                                                | ± | 0.21 |
| <b>femur</b>   | 1.08                                                                   | ± | 0.61 | 0.87                                                | ± | 0.17 |
| <b>colon</b>   | 1.44                                                                   | ± | 0.33 | 1.11                                                | ± | 0.18 |
| <b>ileum</b>   | 1.76                                                                   | ± | 0.33 | 1.54                                                | ± | 0.39 |
| <b>stomach</b> | 1.37                                                                   | ± | 0.36 | 1.16                                                | ± | 0.20 |

Mean (%ID/g) ± SD (n = seven animals per conjugate **1**; n = six animals per conjugate **3**)

**Supplemental Table 7.** Values corresponding to Figure 4B

| time (h)  | trastuzumab- <sup>[195mPt]</sup> Lx-DFO- <sup>89</sup> Zr ( <b>1</b> ) |   |      | trastuzumab- <sup>[195mPt]</sup> Lx-AF ( <b>3</b> ) |   |      |
|-----------|------------------------------------------------------------------------|---|------|-----------------------------------------------------|---|------|
|           | <i>(based on <sup>195m</sup>Pt counting)</i>                           |   |      | <i>(based on <sup>195m</sup>Pt counting)</i>        |   |      |
| <b>2</b>  | 25.17                                                                  | ± | 7.67 | 26.55                                               | ± | 2.34 |
| <b>24</b> | 11.92                                                                  | ± | 2.08 | 11.29                                               | ± | 1.85 |
| <b>48</b> | 9.81                                                                   | ± | 3.02 | 9.82                                                | ± | 1.81 |
| <b>72</b> | 6.83                                                                   | ± | 2.63 | 8.03                                                | ± | 1.16 |

Mean (%ID/g) ± SD (n = seven animals per conjugate **1**; n = six animals per conjugate **3**)

**Supplemental Table 8.** Uptake values corresponding to Figure 5A

| <sup>89</sup> Zr-DFO–trastuzumab–Lx–AF |              |                |                |
|----------------------------------------|--------------|----------------|----------------|
|                                        | AF DAR 0 (4) | AF DAR 2.6 (5) | AF DAR 5.2 (6) |
| <b>blood</b>                           | 5.55 ± 2.13  | 3.24 ± 1.18    | 2.42 ± 0.43    |
| <b>tumor</b>                           | 29.22 ± 6.82 | 26.07 ± 4.92   | 12.88 ± 2.09   |
| <b>skin</b>                            | 2.83 ± 0.52  | 2.61 ± 0.44    | 1.71 ± 0.34    |
| <b>tongue</b>                          | 2.17 ± 0.70  | 1.40 ± 0.26    | 0.85 ± 0.13    |
| <b>sternum</b>                         | 2.60 ± 0.53  | 2.35 ± 0.85    | 1.22 ± 0.04    |
| <b>heart</b>                           | 1.76 ± 0.61  | 1.17 ± 0.24    | 0.74 ± 0.09    |
| <b>lung</b>                            | 2.67 ± 1.33  | 1.96 ± 0.22    | 1.27 ± 0.16    |
| <b>liver</b>                           | 5.67 ± 0.79  | 11.38 ± 2.60   | 28.07 ± 4.19   |
| <b>spleen</b>                          | 2.76 ± 0.62  | 6.01 ± 4.24    | 3.28 ± 0.78    |
| <b>kidney</b>                          | 3.31 ± 0.42  | 3.98 ± 0.44    | 2.96 ± 0.51    |
| <b>muscle</b>                          | 0.73 ± 0.23  | 0.57 ± 0.09    | 0.37 ± 0.04    |
| <b>femur</b>                           | 2.72 ± 0.28  | 3.26 ± 1.58    | 1.83 ± 0.69    |
| <b>colon</b>                           | 0.83 ± 0.36  | 1.18 ± 0.75    | 0.64 ± 0.12    |
| <b>ileum</b>                           | 0.88 ± 0.16  | 1.83 ± 1.42    | 0.66 ± 0.07    |
| <b>stomach</b>                         | 0.84 ± 0.18  | 0.94 ± 0.36    | 0.50 ± 0.07    |

Mean (%ID/g) ± SD (n = six animals per conjugate)



**Supplemental Table 9.** Values corresponding to Figure 5B

| time (h)  | <sup>89</sup> Zr-DFO–trastuzumab–Lx–AF |                |                |
|-----------|----------------------------------------|----------------|----------------|
|           | AF DAR 0 (4)                           | AF DAR 2.6 (5) | AF DAR 5.2 (6) |
| <b>1</b>  | 28.99 ± 6.75                           | 28.22 ± 2.21   | 25.62 ± 2.81   |
| <b>4</b>  | 24.10 ± 4.05                           | 22.81 ± 1.75   | 17.53 ± 2.06   |
| <b>24</b> | 13.76 ± 2.50                           | 10.85 ± 2.01   | 7.24 ± 0.63    |
| <b>48</b> | 10.21 ± 2.88                           | 7.13 ± 1.68    | 4.82 ± 0.48    |
| <b>72</b> | 6.87 ± 2.27                            | 4.41 ± 1.19    | 3.33 ± 0.41    |
| <b>96</b> | 5.55 ± 2.13                            | 3.24 ± 1.18    | 2.42 ± 0.44    |

Mean (%ID/g) ± SD (n = six animals per conjugate)
